# Supplementary material
Source: publisher figshare collection journal article supplement (https://acs.figshare.com/ndownloader/files/3741817)
Supplement: Supplementary file 1 [file 3741817]

## Supplemental Information

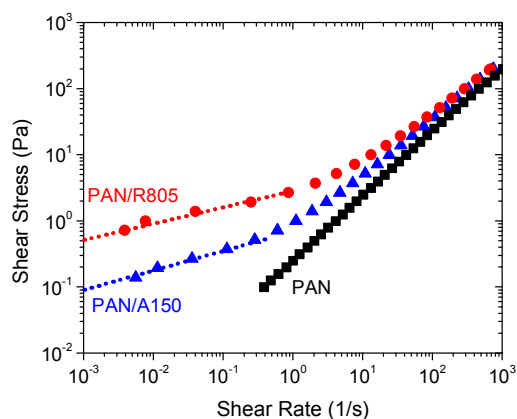

**Supplemental Figure S1.** Stress-strain relationship for 7.9 wt% PAN solutions with and without 2.2 wt% R805 and A150 FS. The dotted line approximates the “yield stress” via the extrapolation model.

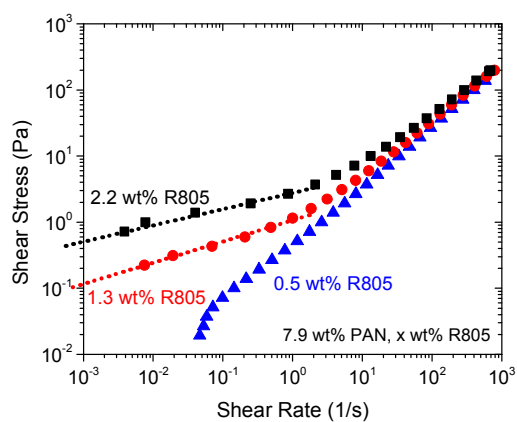

**Supplemental Figure S2.** . Stress-strain relationship for 7.9 wt% PAN solutions with and without 2.2 wt% R805 and A150 FS. The dotted line approximates the “yield stress” via the extrapolation model.

The dotted line approximates the “yield stress” via the extrapolation model.

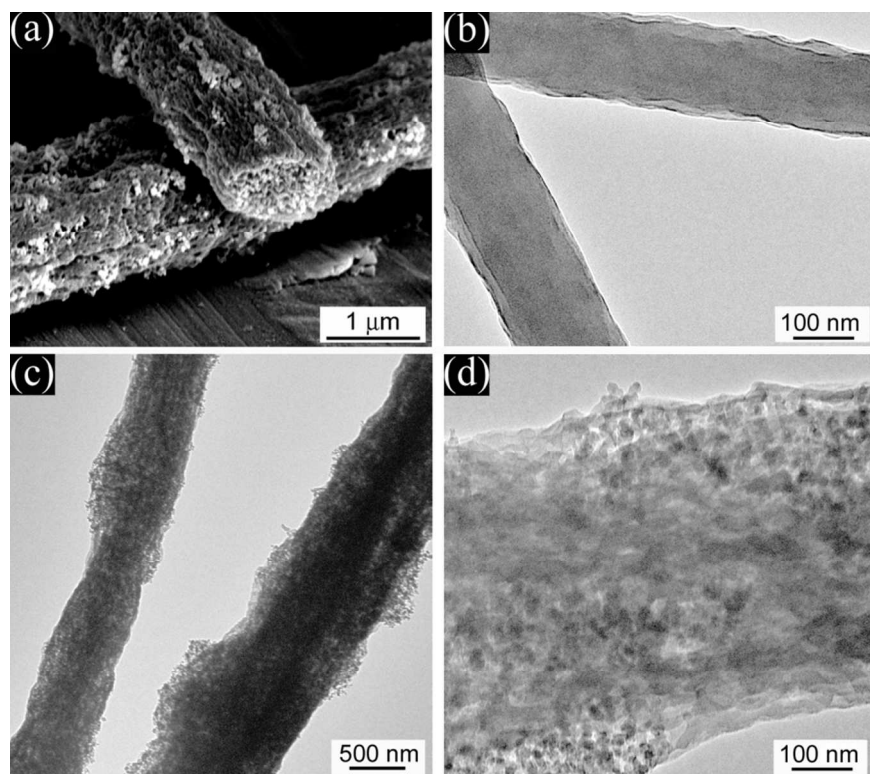

**Supplemental Figure S3.** Scanning and transmission electron micrographs of PAN with R805 FS (a, c, d) and PAN only (b) electrospun fibers. Fiber cross section (a) was prepared by freeze fracture.

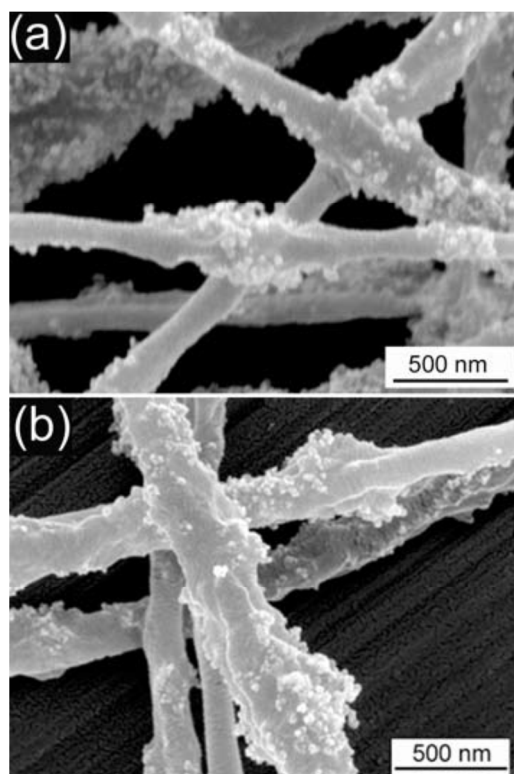

**Supplemental Figure S4.** Scanning electron micrographs of composite polymer/fumed silica electrospun fibers: PEO/R805 FS (a) and PEO/A200 FS (b). The precursor solutions contained PEO (4.6%): FS (2.2%): DMF (93.2%).

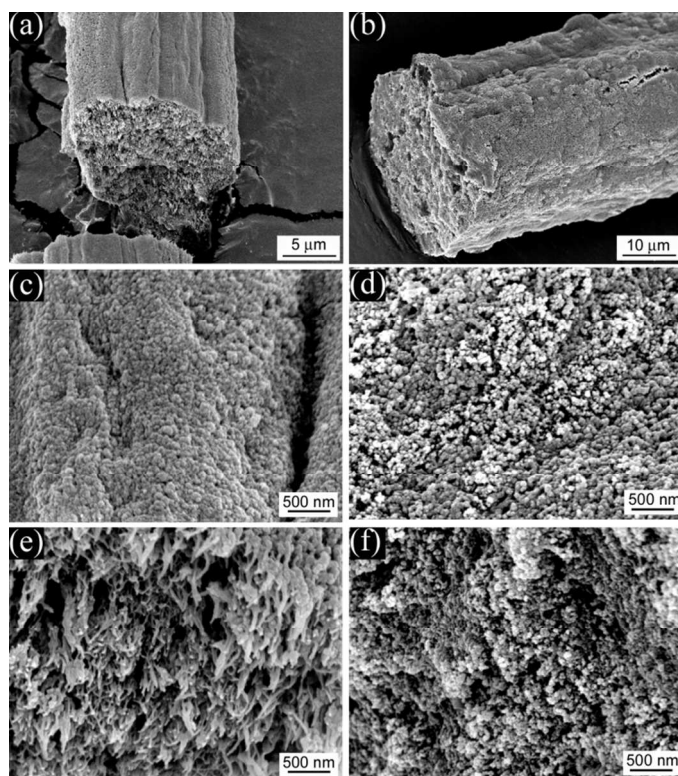

**Supplemental Figure S5.** SEM images of PAN fiber (a), top surface (c), cross section (e); and PAN/R805 FS fiber (b), top surface (d), cross section (f) prepared by wet spinning.
